# Supplementary material for: Anisotropic calcium phosphate nanoparticles coated with 2-carboxyethylphosphonic acid
Source: Royal Society of Chemistry journal article supplement (doi:10.1039/b608073a), 2006-01-01
Supplement: b608073a.pdf [file b608073a.pdf]

**SUPPLEMENTARY INFORMATION**

**FIGURE S1.**

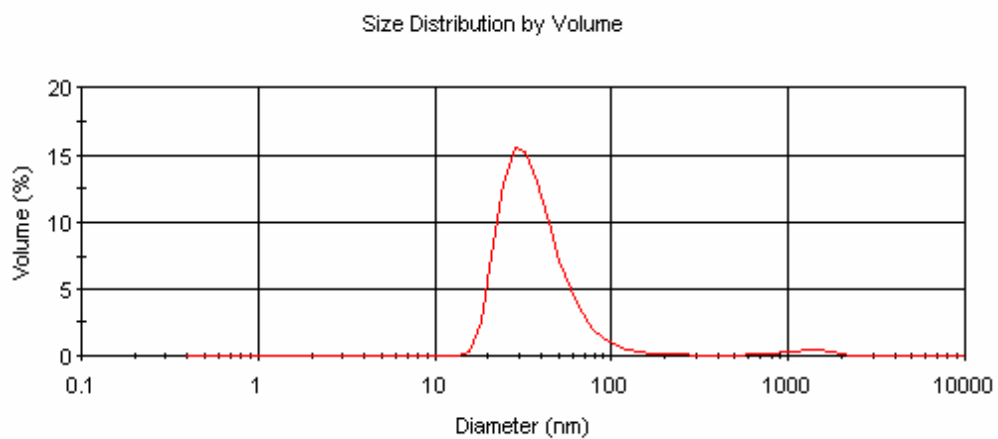

**Figure S1.** Light scattering measurements of CP NP dispersions stabilized by CEPA.

PDDA was added to each sample to form a standard peak to which a peak from various concentrations of CEPA could be compared. The difference in height between a peak from a known concentration of CEPA and the standard PDDA peak was used to make a calibration graph of concentration of CEPA used versus this difference. From this calibration, the concentration of CEPA in the particle suspension could be analyzed. The volume of the drop used for analysis, along with the mass of the dried sample, was then used to find the weight percent of CEPA.

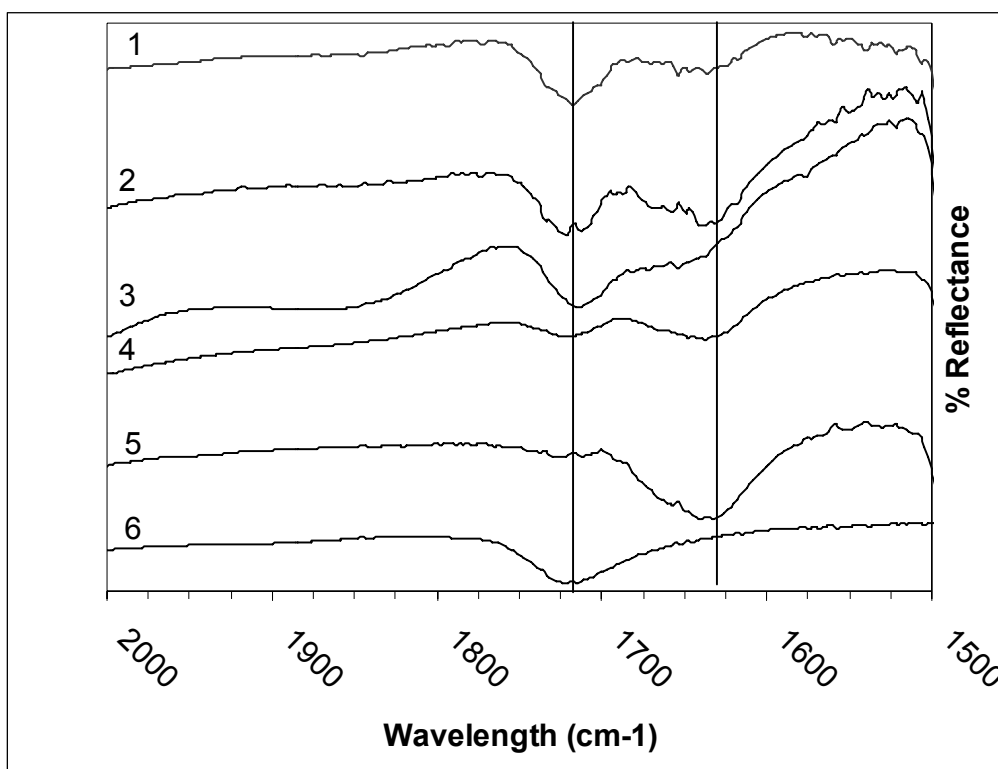

**Figure S2.** FTIR spectra of CP NP dispersion along with CEPA solutions with PDDA standard. (1) 0.39g/L CEPA w/ PDDA (2) 0.196g/L CEPA w/ PDDA (3) CP NP sample w/ PDDA (4) 0.0975 g/L CEPA w/ PDDA (4) Pure PDDA (5) Pure CEPA
